## Potassium Channel Mutant *KCNJ5* T158A Expression in HAC-15 Cells Increases Aldosterone Synthesis

Kenji Oki, Maria W. Plonczynski, Milay Luis Lam, Elise P. Gomez-Sanchez, and Celso E. Gomez-Sanchez

Research and Medical Service (K.O., M.W.P., M.L.L., E.P.G.-S., C.E.G.-S.), G.V. (Sonny) Montgomery Veterans Affairs Medical Center, Division of Endocrinology (K.O., M.W.P., M.L.L., E.P.G.-S., C.E.G.-S.), Department of Medicine, Department of Pharmacology (E.P.G.-S.), The University of Mississippi Medical Center, Jackson, Mississippi 39216

Primary aldosteronism is the most common cause of secondary hypertension, most frequently due to an aldosterone-producing adenoma or idiopathic hyperaldosteronism. Somatic mutations of the potassium channel *KCNJ5* in the region of the selectivity filter have been found in a significant number of aldosterone-producing adenomas. There are also familial forms of primary aldosteronism, one of which, familial hyperaldosteronism type 3 which to date has been found in one family who presented with a severe abnormality in aldosterone and 18-oxocortisol production and hypertrophy and hyperplasia of the transitional zone of the adrenal cortex. In familial hyperaldosteronism type 3, there is a genomic mutation causing a T158A change of amino acids within the selectivity filter region of the *KCNJ5* gene.

We are reporting our studies demonstrating that lentiviral-mediated expression of a gene carrying the T158A mutation of the *KCNJ5* in the HAC15 adrenal cortical carcinoma cell line causes a 5.3-fold increase in aldosterone secretion in unstimulated HAC15-*KCNJ5* cells and that forskolin-stimulated aldosterone secretion was greater than that of angiotensin II. Expression of the mutated *KCNJ5* gene decreases plasma membrane polarization, allowing sodium and calcium influx into the cells. The calcium channel antagonist nifedipine and the calmodulin inhibitor W-7 variably inhibited the effect. Overexpression of the mutated *KCNJ5* channel resulted in a modest decrease in HAC15 cell proliferation.

These studies demonstrate that the T158A mutation of the *KCNJ5* gene produces a marked stimulation in aldosterone biosynthesis that is dependent on membrane depolarization and sodium and calcium influx into the HAC15 adrenal cortical carcinoma cells. (*Endocrinology* 153: 1774–1782, 2012)

**P**rimarily aldosteronism (PA) is characterized by the autonomous excessive production of aldosterone from the adrenal zona glomerulosa (1). Patients with PA are hypertensive and have a high prevalence of cardiovascular and cerebrovascular complications (1, 2). PA is the most frequent cause of the secondary hypertension with a frequency of 5–10% among hypertensives (1). The two most common forms of PA are aldosterone-producing adenomas (APA) and idiopathic hyperaldosteronism, also called

bilateral adrenal zona glomerulosa hyperplasia (1, 3). Some forms of PA are familial, including familial primary aldosteronism type I or glucocorticoid-suppressible aldosteronism, due to a gene duplication produced by the uneven recombination between the 5'-regulatory segments of the cytochrome P450 (CYP)11B1 gene (exons 2–4) and the last exons of the CYP11B2 gene, resulting in a hybrid aldosterone synthase gene that is regulated by ACTH (4, 5). These patients excrete large quantities of the hybrid

ISSN Print 0013-7227 ISSN Online 1945-7170

Printed in U.S.A.

Copyright © 2012 by The Endocrine Society

doi: 10.1210/en.2011-1733 Received September 7, 2011. Accepted January 9, 2012.

First Published Online February 7, 2012

For editorial see page 1575

Abbreviations: A-II, Angiotensin II; APA, aldosterone-producing adenoma; CaMK, calmodulin-dependent protein kinase; CYP, cytochrome P450; FH3, familial hyperaldosteronism type 3; GAPDH, glyceraldehyde-3-phosphate dehydrogenase; GYG, glycine-tyrosine-glycine; PA, primary aldosteronism; STAR, steroidogenic acute regulatory protein; XTT, 2,3-Bis(2-methoxy-4-nitro-5-sulphophenyl)-2H-tetrazolium-5-carboxanilide inner salt.

steroids 18-hydroxycortisol and 18-oxocortisol in addition to aldosterone (6). Familial hyperaldosteronism type 2 is the most common familial form, but it is of unknown etiology with a linkage to chromosome 7p22 in some families (7). In familial hyperaldosteronism type 3 (FH3), of which only one family has been reported to date, patients have severe hypertension and the highest recorded excretion of the hybrid steroids 18-hydroxycortisol and 18-oxocortisol (8).

The resting membrane potential of the zona glomerulosa cell is regulated by potassium ( $K^+$ ) channel activity (9). Voltage-gated calcium ( $Ca^{2+}$ ) channels are activated by membrane depolarization by hyperkalemia and by angiotensin II (A-II). The resulting increase in intracellular  $Ca^{2+}$  initiates the signaling events that increase aldosterone biosynthesis (9). The etiology of APA or idiopathic hyperaldosteronism is unknown. Recently, Choi *et al.* (10) reported the presence either of two somatic mutations of the *KCNJ5* gene coding for the potassium channel Kir3.4 in eight of 22 aldosterone-producing adenomas, as well as in the FH3 family. The mechanisms by which a *KCNJ5* mutation causes increased aldosterone production in adrenal zona glomerulosa cells have not been fully elucidated, although the *KCNJ5* mutations, G151R or L168R, found in the APA tumors were in or near the selectivity filter in the glycine-tyrosine-glycine (GYG) motif of the Kir3.4 protein (10). The family with FH3 has an inherited mutation, T158A, within the same region associated with severe hyperaldosteronism and massive bilateral adrenal cortical hyperplasia with transitional zone characteristics (8, 10).

$K^+$  selectivity of *KCNJ* potassium channel is conferred by a GYG motif at the narrowest part of the pore. Inflow of  $K^+$  through the channel hyperpolarizes the cell membrane (11). The mutation around the GYG motif in the APA and FH3 patients was shown to alter selectivity for cations including  $Na^+$ , thereby depolarizing the cell membrane (12), triggering the opening of the voltage-gated  $Ca^{2+}$  channel (13), resulting in an influx of  $Ca^{2+}$  into the cell that activates sequential cascades including calmodulin and calmodulin kinase, and leading to increased steroidogenesis in adrenal cortical cells (14).

In this study, we hypothesized that expression in the adrenocortical carcinoma cell line HAC15 (15) using a lentivirus carrying a Kir 3.4 mutation (T158A) would increase aldosterone secretion and provide a model with which to address the mechanism of action of *KCNJ5* in adrenal zona glomerulosa cells.

## Materials and Methods

### Cell culture and materials

The HAC15 human adrenocortical carcinoma cell line, a subclone of the H295R, a human adrenocortical carcinoma cell (15,

16), was provided by W. E. Rainey (Georgia Health Care University). The HAC15 cells were cultured in DMEM-F12 (1:1) supplemented with 10% Cosmic Calf serum (HyClone Laboratories, Logan, UT) at 37C under an atmosphere of 5%  $CO_2$ .

A-II and nifedipine were purchased from Sigma Aldrich Co. Ltd. (St. Louis, MO). Forskolin was from LC Laboratories (Woburn, MA), and W-7, an inhibitor of calmodulin, was from Merck KGaA (Darmstadt, Germany). G418 and Blastidin used to select lentiviral infected cells were purchased from InvivoGen (San Diego, CA). The dye to detect membrane voltage, DiSBAC<sub>2</sub> (3), was purchased from AnaSpec (Fremont, CA); those to detect  $Na^+$  inflow, CoroNa Green, and intracellular  $Ca^{2+}$  concentration, Fluo-4 AM, were purchased from Invitrogen (Carlsbad, CA).

### Plasmids

The full-length cDNA of *KCNJ5* (pCR4-TOPO) was purchased from Open Biosystems (Huntsville, AL). The *KCNJ5* mutation (T158A) plasmid was made using the QuikChange II XL Site Directed Mutagenesis kit from Stratagene (Santa Clara, CA) and the following primers: forward, GGCTCCGAGTCATCGCAGAGAAGTGTCCAG; reverse, CTGGACACTTCTCTGCGATGACTCGGAAGCC. The cDNA was then amplified by PCR using the 5'-primer CACCGCTATGGCTGGCGATTCTAGGAA and 3'-primer TTATCACACCGAGCCCCCTGGCC and inserted into pENTR/D-TOPO for subsequent use in LR reactions with the Gateway-compatible lentivector pLX303 plasmid (Addgene plasmid 25897; Addgene, Cambridge MA) (17) by LR reaction method (Invitrogen), resulting in pLX303-*KCNJ5* T158A. Control plasmid was prepared as pLX303 without *KCNJ5*. The sequence of the mutation was confirmed by a PCR-based direct sequencing method.

The lentiviral transfer plasmid pBM14 was obtained from Dr. Fussener (18). Its promoter was eliminated by amplifying the plasmid using primers that excluded the EF1 promoter and introducing a restriction site. The 5'-flanking DNA of CYP11B2 (–1521 bp) from a pGL3 plasmid (a kind gift from Dr. W. Rainey) was fused immediately upstream of the *gussia luciferase* cDNA resulting in pBM14-CYP11B2 promoter/*gussia*. The psPAX2 (Addgene plasmid 12260 from Didier Trono's Laboratory), and pCMV-VSV-G (Addgene plasmid 8454 from the Stewart laboratory (19) for virus production were purchased from Addgene, Inc.

### Lentiviral production and infection

The 293TN cell line (System Biosciences, Mountain View, CA) was cultured in branched PEI25-coated plates (Sigma Aldrich) with DMEM supplemented with FetalClone II serum (HyClone Laboratories, Logan, UT) until 80–90% confluent, and then transfected with lentiviral transfer vector, psPAX2, and pCMV-VSV-G (0.41  $\mu g/cm^2$ ; 12:14:8 molar ratio) using PEI22 (20). Medium was replaced after an overnight incubation, after which cells were cultured for an additional 48 h. Supernatant collected from this cell culture was centrifuged at 3000  $\times g$  for 30 min at 4C and stored at –80C.

Transduction with control or *KCNJ5*-T158A lentivirus was performed 24 h after seeding HAC15 (21, 22). To assess steroid production, membrane voltage, mRNA expression, and intracellular  $Ca^{2+}$  concentration 72 h after infection, cells were serum deprived using DMEM-F12 supplemented with 0.1% cosmic

calf serum for 24 h. The medium was replaced with fresh DMEM-F12 containing 0.1% cosmic calf serum with or without 10 nM A-II, 10  $\mu$ M forskolin, 3 or 10  $\mu$ M nifedipine, or 10 or 30  $\mu$ M W-7. Cells were incubated for 18 h, after which the supernatants were collected for steroid measurement and the cells were harvested for analysis of mRNA and protein expression.

To investigate the effect of KCNJ5-T158A on cell proliferation and apoptosis assay, HAC15 cells were stably infected with control or KCNJ5-T158A lentivirus as previously described (23). Briefly, 72 h after infection, the cells were selected with 5  $\mu$ g/ml of blasticidin. The cells were cultured for at least 4 wk in the absence of the selecting agent before performing the experiments to avoid any confounding effect due to the selecting antibiotic.

### Luciferase assay

To assess the CYP11B2 activity, we transduced HAC15 cells with lentivirus carrying the pBM14-CYP11B2 promoter/gaussia luciferase as above, using G418 (0.5 mg/ml) for antibiotic selection. The stably transduced cells were plated in 48-well plates and then transduced with control or KCNJ5-T158A lentivirus. The supernatants were collected and placed in 96-well plates for luminescence detection using the gaussia luciferase substrate coelenterazine (Gold Biotechnology, St. Louis, MO), and read with a BMG FLUOstar Omega Reader (BMG Labtech, Ortenberg, Germany) (24).

### RNA extraction and RT-PCR

Total RNA was extracted with the RNAzol-RT Reagent (Molecular Research Center, Inc., Cincinnati, OH). For reverse transcription, 1.5  $\mu$ g of total RNA was incubated with SUPERase-In (Applied Biosystems/Ambion, Austin, TX) or SuperScript III (Invitrogen) following the manufacturer's protocol. Table 1 shows real-time PCR primers designed to generate approximately 100-bp amplicons. CYP11B2, CYP11B1, and glyceraldehyde-3-phosphate dehydrogenase (GAPDH) mRNA expression were determined by the Taqman Gene expression assay as previously reported (21). mRNA expression of steroidogenic acute regulatory protein (STAR), cytochrome P450, family 11, subfamily A, polypeptide 1 (CYP11A1), 3 $\beta$ -hydroxysteroid dehydrogenase, cytochrome P450, family 21, subfamily A, polypeptide 2 (CYP21A2), cytochrome P450, family 17, subfamily A, polypeptide 1 (CYP17A1) and GAPDH were quantified with 1  $\mu$ l reverse transcription product, 1  $\mu$ l Titanium Taq DNA polymerase (CLONTECH Laboratories, Inc., Mountain View, CA), 1:20000 dilution SYBR Green I (Molecular Probes, Carlsbad, CA), 10 nM (Bio-Rad Laboratories, Hercules, CA), 0.2 mM deoxynucleotide triphosphates, and 0.1  $\mu$ M each primer. Real-time data were obtained during the extension phase, and

critical threshold cycle values were calculated at the log phase of each gene amplification curve. Gene expression levels were analyzed as arbitrary units normalized against GAPDH mRNA expression.

### Cell proliferation and apoptosis assay

The 2,3-Bis(2-methoxy-4-nitro-5-sulphophenyl)-2H-tetrazolium-5-carboxanilide inner salt (XTT) cell proliferation assay kit (American Type Culture Collection, Manassas, VA) was used to evaluate the effect of KCNJ5-T158A on cell proliferation (25). Briefly, the stably transduced control and KCNJ5-T158A cells were seeded on 96-well plates at a concentration of  $5 \times 10^4$  cells per well and incubated with 50  $\mu$ l of activated-XTT solution for 4 h, following the manufacturer's protocol. The absorbance of the wells was measured at a wavelength of 475 nm and 660 nm.

For crystal violet staining, the stably transduced cells were plated at  $1 \times 10^5$  cells per well in 48-well plates, the supernatant was aspirated at the indicated times, and the cells were fixed for 20 min in 10% paraformaldehyde. They were then stained for 30 min with a 0.05% solution of crystal violet, washed with water, then solubilized in 1% sodium dodecyl sulfate solution for 1 h, and absorbance was read at 590-nm wavelength.

The commercial Caspase-3/ CPP32 detection kit (InvivoGen) was used to investigate the effect of KCNJ5-T158A on the apoptotic state. The stably transduced cells were plated at  $1 \times 10^6$  cells per well in 12-well plates, and cells were harvested and incubated following the manufacturer's instruction.

### Analysis of inflow of Na<sup>+</sup> into cytoplasm, plasma membrane voltage, and intracellular Ca<sup>2+</sup> concentration

After transduction with control or KCNJ5-T158A lentiviruses and serum starving as above, the medium was replaced with fresh DMEM-F12 containing 0.1% cosmic calf serum with 10  $\mu$ M CoroNa Green dye to assess Na<sup>+</sup> flow into cytoplasm, 3  $\mu$ M DiSBAC<sub>2</sub> for membrane voltage, or 3  $\mu$ M Fluo-4 AM for intracellular Ca<sup>2+</sup> concentration. After incubation for the indicated times, the cells were washed three times with HEPES buffer, and fluorescence was detected with a BMG FLUOstar Omega Reader.

### Steroid and protein assays

Aldosterone, cortisol, and 18-oxocortisol levels were measured in cell culture supernatants by time-resolved fluorescence. The primary antibodies were developed in our laboratory as previously described (26, 27). The protein levels were detected by ELISA using a Micro BCA Protein Assay kit (Thermo Scientific, Rockford, IL).

**TABLE 1.** Real-time PCR primers

| Gene symbol | Forward primer           | Reverse primer              |
|-------------|--------------------------|-----------------------------|
| STAR        | CATACTCTAAACACGAACCCACC  | GTCCACCCTGCCTCTGAAG         |
| CYP11A1     | CTTCTTCGACCCGGAAATTT     | CCGGAAGTAGGTGATGTTCTTG      |
| HSD3B2      | AGAAGAGCCTCTGGAAAACACATG | TAACGCACAAGGTACAAGGTATCACCA |
| CYP21A2     | TCCCAGCACTCAACCAACT      | CAGCTCAGAATTAAGCCTCAATCC    |
| CYP17A1     | AGCCGCACACCAACTATCAG     | TCACCGATGCTGGAGTCAAC        |
| CYP11B1     | GGCAGAGGCAGAGATGCTG      | TCTTGGGTTAGTGTCTCCACCTG     |
| CYP11B2     | GGCAGAGGCAGAGATGCTG      | CCTGAGTTAGTGTCTCCACCAGGA    |
| GAPDH       | CCCCTTCATTGACCTCAACTAC   | GATGACAAGCTTCCCCTTCTC       |

## Statistical analysis

All results were expressed as mean  $\pm$  SE of at least three separate experiments in which each sample was assayed in triplicate or quadruplicate. Differences between two groups were analyzed for statistical significance by *t* test and multiple groups were analyzed by one-way ANOVA followed by Bonferroni comparisons. The differences were considered to be significant at  $P < 0.05$ . Analyses were performed using SPSS for Windows (release 12.0; SPSS Inc., Chicago, IL).

## Results

### The effects of KCNJ5-T158A on aldosterone production

The sequence of the KCNJ5-T158A plasmid was confirmed by a direct sequence method. Transduction of HAC15 cells with the lentivirus carrying the KCNJ5-T158A mutation potentiated basal aldosterone production 5.3-fold over empty lentivirus-infected HAC15 control cells (Fig. 1A). Cells transduced with the wild KCNJ5 lentivirus decreased aldosterone production and were not used as controls in these experiments (data not shown). To compare the effects of KCNJ5-T158A on aldosterone production induced by A-II and forskolin, we measured aldosterone levels in the supernatants of control and KCNJ5-T158A cells stimulated by A-II and forskolin. There was no difference in the level of aldosterone stimulation between A-II and forskolin in control cells, but aldosterone secretion stimulated by forskolin was significantly greater than by A-II in KCNJ5-T158A cells (Fig. 1A). Cortisol production was only slightly, but significantly, stimulated by KCNJ5-T158A (Fig. 1B). KCNJ5-T158A-infected cells also showed enhanced 18-oxocortisol production compared with control HAC15 cells (Fig 1C).

### The alteration of extracellular Na<sup>+</sup> inflow into cytoplasm, membrane voltage, and intracellular Ca<sup>2+</sup> concentration by the KCNJ5-T158A mutation in HAC15 cells

To elucidate the mechanism of the effect of the KCNJ5-T158A mutation on aldosterone production, we first investigated its effect on Na<sup>+</sup> inflow in the HAC15 cells using a cell-impermeant dye, CoroNa Green. KCNJ5-T158A cells had a 1.2-fold higher fluorescence for Na<sup>+</sup> than control cells, indicating that Na<sup>+</sup> inflow was increased by the mutation (Fig. 2A). KCNJ5-T158A cells showed a 2.3-fold increased accumulation of DiSBAC<sub>2</sub> (3), an indicator of higher plasma membrane voltage than control cells (Fig. 2B). As shown in Fig. 2C, KCNJ5-T158A caused a 1.6-fold increase in Fluo-4 AM, an indicator of intracellular

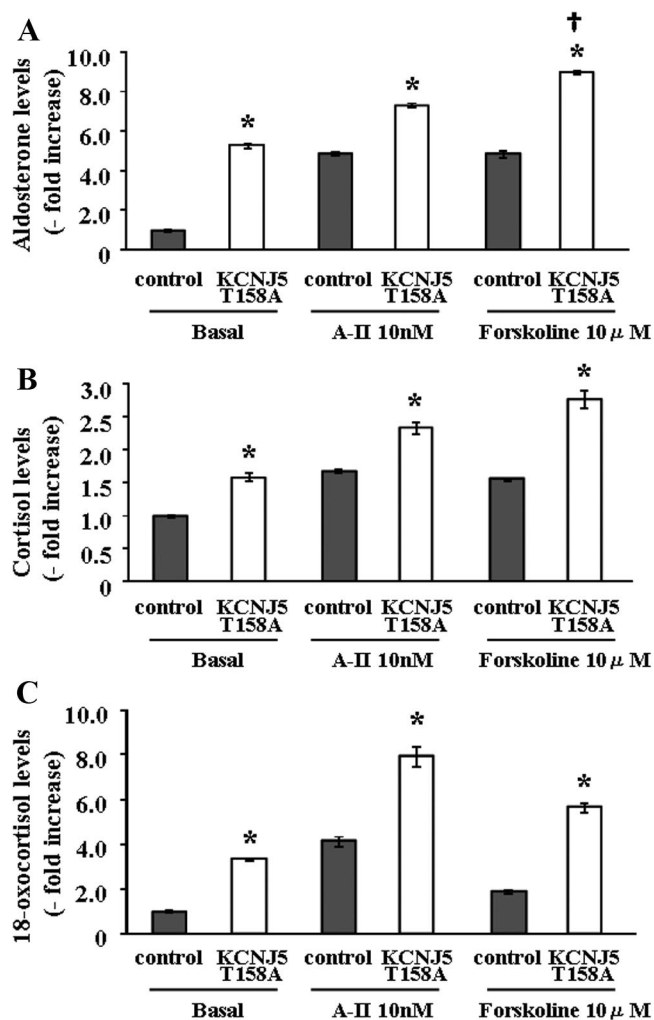

**FIG. 1.** Basal and stimulated aldosterone (A), cortisol (B), and 18-oxocortisol (C) production by HAC15 infected with control or KCNJ5 T158A lentiviruses. Cells were incubated for 24 h with no secretagogue or 10 nm of either A-II or 10  $\mu$ M forskolin. \*,  $P < 0.01$  vs. each control,  $n = 4$ . †,  $P < 0.01$  vs. aldosterone levels after A-II stimulation in KCNJ5-T158A cells ( $n = 4$ ).

Ca<sup>2+</sup> concentration, compared with control. These results suggested that the KCNJ5-T158A mutation led to a sequential increase in Na influx, membrane voltage, and intracellular Ca<sup>2+</sup> accumulation.

### mRNA expression and reporter assay of steroid biosynthetic enzymes

The expression of CYP11B1 and CYP11B2 mRNA in KCNJ5-T158A cells was significantly elevated by 5.8-fold and 17.7-fold in comparison to control cells, respectively (Fig. 3). However, no differences of other steroidogenic enzymes or StAR were observed between control and KCNJ5-T158A cells (Fig. 3), except for CYP17A1, which was significantly decreased.

We investigated the transcriptional regulation of CYP11B2 analyzed by luciferase assays using HAC15

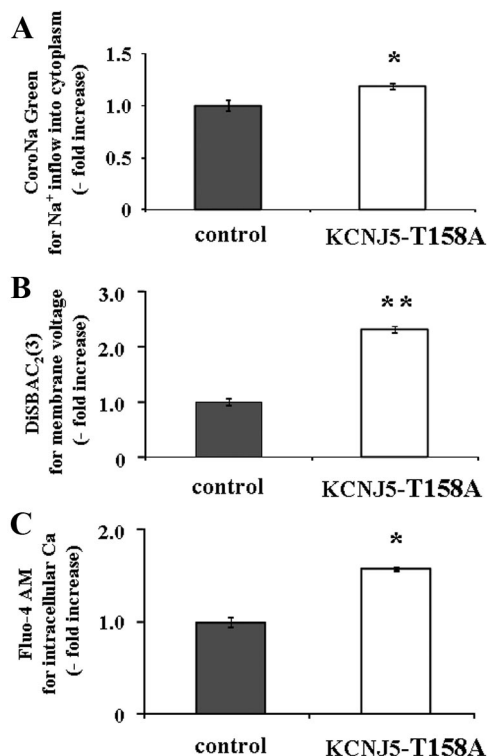

**FIG. 2.** Effect of the KCNJ5-T158A mutation on Na<sup>+</sup> influx, membrane voltage, and intracellular Ca<sup>2+</sup> concentration in HAC15 cells transduced with control or KCNJ5-T158A lentiviruses. Seventy two hours after infection, cells were serum deprived in DMEM-F12 containing 0.1% cosmic calf serum for 24 h, and then incubated with fresh media with 0.1% serum and 10  $\mu$ M CoroNa Green for 2 h (A), 3  $\mu$ M DISBAC<sub>2</sub>(3) for 5 min (B), or 3  $\mu$ M Fluo-4 AM for 10 min (C). Fluorescence was detected by a plate reader. Results were expressed as fold increase vs. control cells. \*,  $P < 0.05$ ; and \*\*,  $P < 0.01$  vs. control ( $n = 4$ ).

cells stably infected with each reporter construct. As shown in Fig. 4, CYP11B2 transcriptional activity in KCNJ5-T158A cells showed 2.8-fold increase compared with that in control cells.

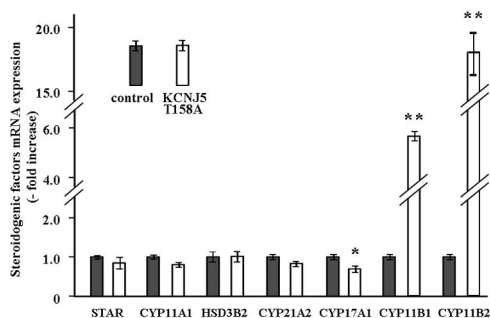

**FIG. 3.** Effect of the KCNJ5-T158A mutation on mRNA expression of the key proteins for adrenal steroid synthesis: STAR, CYP11A1, 3 $\beta$ -hydroxysteroid dehydrogenase, CYP21A2, CYP17A1, CYP11B1, and CYP11B2. Seventy two hours after infection, cells were serum deprived in DMEM-F12 containing 0.1% cosmic calf serum for 24 h, and then incubated with fresh media with 0.1% serum for 3 h. After aspiration of media, the cells were collected for RNA extraction, and real time RT-PCR was performed with the primers shown in Table 1. Results were normalized by GAPDH mRNA expression and expressed as fold increase vs. control. \*,  $P < 0.05$ ; and \*\*,  $P < 0.01$  vs. control ( $n = 3$ ).

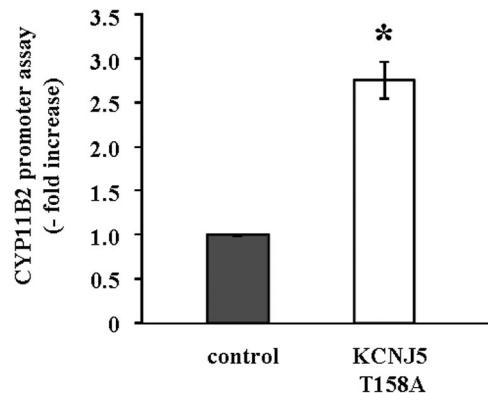

**FIG. 4.** Effect of the KCNJ5-T158A mutation on CYP11B2 reporter gene expression. HAC15 cells stably infected with pBM14-CYP11B2 promoter/gussia were infected with control or KCNJ5-T158A lentiviruses. After 72 h incubation, cells were serum deprived in DMEM-F12 containing 0.1% cosmic calf serum for 24 h, incubated in fresh media with 0.1% serum for 24 h, and supernatants collected to assess luminescence. Results shown as fold increase vs. control cells. \*,  $P < 0.01$  vs. control ( $n = 3$ ).

### Calcium channels and calmodulin mediate the aldosterone production in KCNJ5-T158A cells

To determine the role of increased intracellular Ca<sup>2+</sup> in aldosterone production in KCNJ5-T158A cells, aldosterone levels in the supernatant of KCNJ5-T158A cells treated with or without 3 or 10  $\mu$ M nifedipine or 10 or 30  $\mu$ M W-7 was measured. Nifedipine (10  $\mu$ M) and W-7 (30  $\mu$ M) showed 75% and 18% inhibition of aldosterone production, respectively (Fig. 5A). Nifedipine (10  $\mu$ M) and W-7 (30  $\mu$ M) also inhibited CYP11B2 reporter activity by 46% and 20%, respectively (Fig. 5B). These results indicated that increased intracellular Ca<sup>2+</sup> has a role in the regulation of aldosterone production in KCNJ5-T158A cells.

### Effects of KCNJ5-T158A on adrenal cell proliferation

Proliferation of cells transduced with KCNJ5-T158A lentivirus was significantly less than that of control cells as detected by crystal violet staining (25.2% reduction) and XTT assay (31.8% reduction) after 72 h incubation (Fig. 6, A and B). Cells transduced with wild KCNJ5 lentivirus had no effect on proliferation (data not shown). We performed an apoptosis assay using Caspase-3 protein measurement, because the protein is reported to be regulated in human adrenal cells for apoptosis (28). No difference of Caspase-3 protein levels between control and KCNJ5-T158A cells (1.07  $\pm$  0.07-fold increase) was found. Next, to know whether the negative effect of KCNJ5-T158A on cell proliferation was mediated by intracellular Ca<sup>2+</sup> concentration, we investigated the effects of nifedipine on cell proliferation in control and KCNJ5-T158A cells. Nifedipine caused a 22.7% and 33.0% reduction of cell prolif-

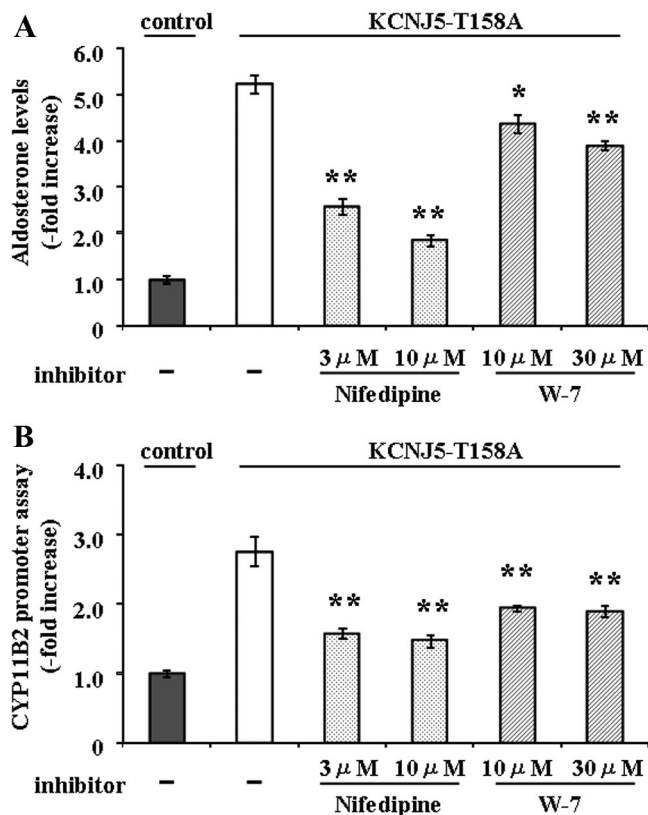

**FIG. 5.** Effect of nifedipine and W-7 on aldosterone production (A) and CYP11B2 reporter gene activation (B) on control and KCNJ5-T158A mutant HAC15 cells stably transduced with pBM14-CYP11B2 promoter/gaussia reporter gene. Seventy two hours after infection with control or KCNJ5-T158A lentivirus, HAC15 cells were serum deprived in DMEM-F12 containing 0.1% cosmic calf serum for 24 h and then incubated in the fresh media with 0.1% serum and with or without 3  $\mu\text{M}$  or 10  $\mu\text{M}$  nifedipine or 10  $\mu\text{M}$  or 30  $\mu\text{M}$  W-7 for 24 h. Results were expressed as fold increase vs. control cells. \*,  $P < 0.05$ ; and \*\*,  $P < 0.01$  vs. control ( $n = 4$ ) (A); \*\*,  $P < 0.01$  vs. control ( $n = 3$ ) (B).

eration by crystal violet staining and XTT assay in control cells, respectively (Fig. 6, A and B). KCNJ5-T158A cells were further negatively regulated with nifedipine treatment as detected by crystal violet staining (24.2% reduction) and XTT assay (21.0% reduction), compared with control cells with nifedipine (Fig. 6, A and B). Therefore, nifedipine does not influence the difference of cell proliferation between control and KCNJ5-T158A cells, indicating that the effect of cell proliferation is independent of intracellular calcium concentration.

## Discussion

Certain mutations around the GYG motif in KCNJ5 cause a loss in  $\text{K}^+$  selectivity and an increase in  $\text{Na}^+$  influx into cytoplasm (12), resulting in the depolarization of the plasma membrane, thereby activating the voltage-gated  $\text{Ca}^{2+}$  channel, and accumulation of intracellular  $\text{Ca}^{2+}$ .

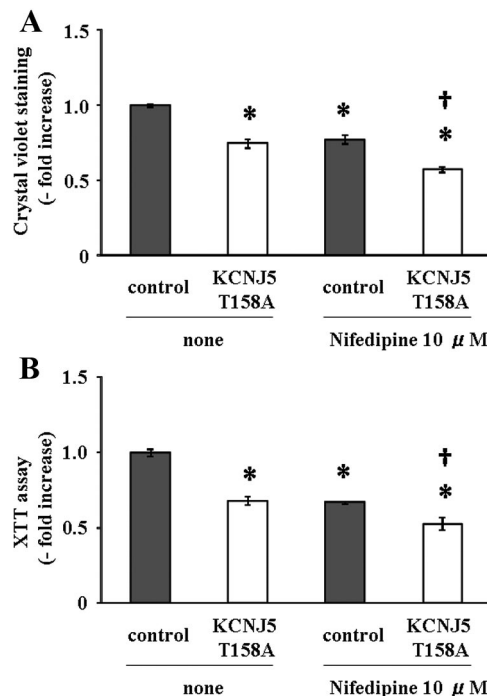

**FIG. 6.** Effect of the KCNJ5 T158A mutation on HAC15 cell proliferation with or without nifedipine (10  $\mu\text{M}$ ). The identical numbers of control and KCNJ5-T158A cells were plated. After 72 h, crystal violet staining (A) and XTT assays (B) were performed. The results of crystal violet staining and XTT assay were expressed as the KCNJ5 T158A mutation cells compared with that of the control cells for each time point. \*,  $P < 0.01$  vs. control ( $n = 4$ ). †,  $P < 0.01$  vs. control with nifedipine ( $n = 4$ ).

We showed that KCNJ5-T158A-transduced adrenocortical cells had a greater influx of  $\text{Na}^+$  into cytoplasm, increased intracellular  $\text{Ca}^{2+}$  concentration, and higher membrane voltage. Increased intracellular  $\text{Ca}^{2+}$  activates calmodulin-dependent kinase (CaMK) I and subsequent regulation of gene transcription, resulting in the synthesis of steroidogenic enzymes and increased aldosterone production (14). mRNA expression and transcriptional activity of CYP11B2 were up-regulated in KCNJ5-T158A cells, resulting in the increase in aldosterone production. Because the  $\text{Ca}^{2+}$  channel blocker and calmodulin antagonist suppressed the CYP11B2 transcriptional activity and aldosterone production in KCNJ5-T158A cells, the increased CYP11B2 expression in these cells appears to be mediated by the  $\text{Ca}^{2+}$ /calmodulin cascade. Whereas transduction of HAC15 cells with KCNJ5-T158A lentiviruses stimulated aldosterone production, cell proliferation was inhibited, consistent with published results showing that increased intracellular  $\text{Ca}^{2+}$  negatively regulates cell proliferation (29, 30).

The KCNJ5-T158 corresponds to the chicken KCNJ12-T152, which is highly conserved among species and identical to other inward-rectifier  $\text{K}^+$  channels (10, 31). The crystal structure of chicken KCNJ12 (Kir2.2), the only one available

for the inward-rectifier  $K^+$  channels, shows that the pore helix and selectivity filter is 89% identical to the human KCNJ5 (31). The KCNJ5-T158 is near the GYG motif in the pore and makes hydrogen bonds with conserved positions P128 and C129 to maintain pore function (10). Mutations near GYG motif change the plasma membrane voltage by altering  $K^+$  selectivity (12). Therefore, disruption of hydrogen binding by the KCNJ5-T158A mutation could alter pore morphology, resulting in loss of  $K^+$  selectivity (10). Our results show that there is an increase in  $Na^+$  inflow in cells transduced with the KCNJ5-T158A lentiviruses and support this explanation.

Other potassium channels participate in aldosterone regulation. TWIK-related acid-sensitive K TASK-1 and TASK-3 subunits, of the KCNK family of two-pore domain/four-transmembrane K channels, regulate the rectification properties in physiological asymmetric  $K^+$  solutions. TASK 1 subunit-knockout mice and TASK 1 + 3 double-knockout mice exhibited depolarized membrane voltage in the adrenal cortex and activation of voltage-dependent  $Ca^{2+}$  channel, producing aldosterone hypersecretion (32, 33). Aldosterone synthase expression is normally restricted to the adrenal zona glomerulosa cell. TASK 1-knockout mice exhibited a gender-specific alteration in adrenal aldosterone synthesis characterized by expression of the aldosterone synthase in the zona fasciculata of female mice, which was glucocorticoid suppressible (32). The large  $Ca^{2+}$ -activated  $K^+$  (BK) channel mediates steady hyperpolarization as a result of transient outward currents carried by BK channels, which were spontaneously activated by the local release of  $Ca^{2+}$  from intracellular stores (34). Recent studies show that aldosterone concentration in blood is elevated in both BK- $\alpha$  and BK- $\beta$ 1-knockout mice (35).

Calmodulin is highly expressed in the adrenal cortex (36), and the increase in intracellular  $Ca^{2+}$  by voltage-gated receptors activates calmodulin, which activates CaMK I and stimulates aldosterone production (14). We observed that the increase of membrane voltage by the KCNJ5 mutation enhanced the intracellular  $Ca^{2+}$  concentration and increased in CYP11B2 mRNA expression and aldosterone production. Calcium channel and calmodulin antagonists suppressed these increases in the mutant cells.

The steroid production profile of HAC15 transduced with KCNJ5-T158A lentiviruses was comparable to that of patients with aldosterone-producing adenomas and FH3 (8, 10). H295R, the parent cell line of the HAC15 cell, and the HAC15 cell do not respond or respond poorly to ACTH but respond well to the PKA activator forskolin (15, 37). As shown in Fig 1A, the response to forskolin was more prominent than that to A-II. Aldosterone-producing

adenomas respond better to ACTH than to A-II (38–40). Our *in vitro* findings regarding enhancement of the  $Ca^{2+}$ /calmodulin-related cascade are consistent with recent evidence showing that APA have activated  $Ca^{2+}$ /CaMK pathways (41), and a microarray study indicated that the CaMK-dependent pathways are enhanced in a subset of the APA (42). Patients with APA synthesize significant quantities of the hybrid steroid 18-oxocortisol (43, 44), and patients with FH3 produce massive amounts of 18-oxocortisol (8). Consistent with the *in vivo* findings in patients with FH3, compared with control cells, the HAC15-KCNJ5-T158A cells produced significantly greater amounts of 18-oxocortisol, as well as aldosterone, under basal conditions, and synthesis was further enhanced by stimulation. In the family with FH3, the very high production of aldosterone and 18-oxocortisol in FH3 was not suppressible with dexamethasone, probably reflecting the marked increase in cells with transitional zone characteristics (8). The KCNJ5-T158A mutation has only been found in FH3, although the KCNJ5-G151R and G168R mutations found in some APA adenomas are in the same selectivity region of the KCNJ5 potassium channel, thus would be expected to show similar characteristics with respect to basal and stimulated alterations in aldosterone secretion (10).

Aldosterone-producing adenomas are generally small, but in the initial report of patients with the somatic mutations in KCNJ5, the tumors were relatively large (8). Activation of  $Ca^{2+}$  signaling inhibits growth in the  $G_2$  phase of the cell cycle in mammalian cell lines and budding yeast (29). Expression of a constitutive form of calcium/CaMK II leads to the arrest of the cell cycle in  $G_2$  (30). Similarly, colon cancer appears to be inhibited by the increase in intracellular  $Ca^{2+}$  concentration in clinical and experimental studies (45, 46). In FH3, characterized by the genomic KCNJ5-T158A mutation, there is atrophy or suppression of zona glomerulosa and marked hyperplasia and cellular hypertrophy of an area characteristic of the transitional zone and/or zona fasciculata (8). The discrepancy between the cell-specific hyperplasia and hypertrophy in FH3 adrenals and the decreased proliferation of HAC15-KCNJ5-T158A cells might be due to the fact that the HAC15 cells were derived from an adrenal carcinoma, which might differ from *in vivo* development of an adenoma (47).

In conclusion, we have demonstrated the mechanism of increased aldosterone synthesis produced by a mutation near the GYG motif in the selectivity filter of the potassium channel that mediates inward rectifying currents. HAC15 infected with a KCNJ5-T158A lentivirus carrying a mutation near the GYG motif in the selectivity filter results in decreased ion selectivity of the channel, membrane depo-

larization, activation of voltage-gated Ca<sup>2+</sup> channels, increased intracellular Ca<sup>2+</sup> concentration, CYP11B2 overexpression, and increased aldosterone and 18-oxocortisol production.

## Acknowledgments

Address all correspondence and requests for reprints to: Celso E. Gomez-Sanchez, M.D., G.V. (Sonny) Montgomery Veterans Affairs Medical Center, 1500 East Woodrow Wilson Drive, Jackson, Mississippi 39216. E-mail: cgomez-sanchez@umc.edu.

This work was supported by National Institutes of Health grants HL27255 and HL105383 and from medical research funds from the Department of Veterans Affairs.

Disclosure Summary: K.O., M.W.P., M.L.L., E.P.G.-S., and C.E.G.-S. have nothing to declare.

## References

- Funder JW, Carey RM, Fardella C, Gomez-Sanchez CE, Mantero F, Stowasser M, Young Jr WF, Montori VM 2008 Case detection, diagnosis, and treatment of patients with primary aldosteronism: an endocrine society clinical practice guideline. *J Clin Endocrinol Metab* 93:3266–3281
- Milliez P, Girerd X, Plouin PF, Blacher J, Safar ME, Mourad JJ 2005 Evidence for an increased rate of cardiovascular events in patients with primary aldosteronism. *J Am Coll Cardiol* 45:1243–1248
- Mulatero P, Bertello C, Rossato D, Mengozzi G, Milan A, Garrone C, Giraudo G, Passarino G, Garaballo D, Verhovez A, Rabbia F, Veglio F 2008 Roles of clinical criteria, computed tomography scan, and adrenal vein sampling in differential diagnosis of primary aldosteronism subtypes. *J Clin Endocrinol Metab* 93:1366–1371
- Lifton RP, Dluhy RG, Powers M, Rich GM, Gutkin M, Fallo F, Gill Jr JR, Feld L, Ganguly A, Laidlaw JC, Murnaghan DJ, Kauffman C, Stockigt J, Ulick I, Lalouel J-M 1992 Hereditary hypertension caused by chimeric gene duplication and ectopic expression of aldosterone synthase. *Nat Genet* 2:66–74
- Pascoe L, Curnow KM, Slutsker L, Connell JM, Speiser PW, New MI, White PC 1992 Glucocorticoid-suppressible hyperaldosteronism results from hybrid genes created by unequal crossovers between CYP11B1 and CYP11B2. *Proc Natl Acad Sci USA* 89:8327–8331
- Gomez-Sanchez CE, Gill Jr JR, Ganguly A, Gordon RD 1988 Glucocorticoid-suppressible aldosteronism: a disorder of the adrenal transitional zone. *J Clin Endocrinol Metab* 67:444–448
- Sukor N, Mulatero P, Gordon RD, So A, Duffy D, Bertello C, Kelemen L, Jeske Y, Veglio F, Stowasser M 2008 Further evidence for linkage of familial hyperaldosteronism type II at chromosome 7p22 in Italian as well as Australian and South American families. *J Hypertens* 26:1577–1582
- Geller DS, Zhang J, Wisgerhof MV, Shackleton C, Kashgarian M, Lifton RP 2008 A novel form of human mendelian hypertension featuring nonglucocorticoid-remediable aldosteronism. *J Clin Endocrinol Metab* 93:3117–3123
- Spät A, Hunyady L 2004 Control of aldosterone secretion: a model for convergence in cellular signaling pathways. *Physiol Rev* 84:489–539
- Choi M, Scholl UI, Yue P, Björklund P, Zhao B, Nelson-Williams C, Ji W, Cho Y, Patel A, Men CJ, Lolis E, Wisgerhof MV, Geller DS, Mane S, Hellman P, Westin G, Åkerström G, Wang W, Carling T, Lifton RP 2011 K<sup>+</sup> channel mutations in adrenal aldosterone-producing adenomas and hereditary hypertension. *Science* 331:768–772
- Heginbotham L, Abramson T, MacKinnon R 1992 A functional connection between the pores of distantly related ion channels as revealed by mutant K<sup>+</sup> channels. *Science* 258:1152–1155
- Dibb KM, Rose T, Makary SY, Claydon TW, Enkvetchakul D, Leach R, Nichols CG, Boyett MR 2003 Molecular basis of ion selectivity, block, and rectification of the inward rectifier Kir3.1/Kir3.4 K(+) channel. *J Biol Chem* 278:49537–49548
- Yao J, Davies LA, Howard JD, Adney SK, Welsby PJ, Howell N, Carey RM, Colbran RJ, Barrett PQ 2006 Molecular basis for the modulation of native T-type Ca<sup>2+</sup> channels in vivo by Ca<sup>2+</sup>/calmodulin-dependent protein kinase II. *J Clin Invest* 116:2403–2412
- Condon JC, Pezzi V, Drummond BM, Yin S, Rainey WE 2002 Calmodulin-dependent kinase I regulates adrenal cell expression of aldosterone synthase. *Endocrinology* 143:3651–3657
- Parmar J, Key RE, Rainey WE 2008 Development of an adrenocorticotropin-responsive human adrenocortical carcinoma cell line. *J Clin Endocrinol Metab* 93:4542–4546
- Wang T, Rainey WE 5 September 2011 Human adrenocortical carcinoma cell lines. *Mol Cell Endocrinol* 10.1016/j.mce.2011.08.041
- Yang X, Boehm JS, Yang X, Salehi-Ashtiani K, Hao T, Shen Y, Lubonja R, Thomas SR, Alkan O, Bhimdi T, Green TM, Johannessen CM, Silver SJ, Nguyen C, Murray RR, Hieronymus H, Balcha D, Fan C, Lin C, Ghamsari L, Vidal M, Hahn WC, Hill DE, Root DE 2011 A public genome-scale lentiviral expression library of human ORFs. *Nat Methods* 8:659–661
- Mitta B, Rimann M, Ehrenguber MU, Ehrbar M, Djonov V, Kelm J, Fussenegger M 2002 Advanced modular self-inactivating lentiviral expression vectors for multigene interventions in mammalian cells and in vivo transduction. *Nucleic Acids Res* 30:e113
- Stewart SA, Dykxhoorn DM, Palliser D, Mizuno H, Yu EY, An DS, Sabatini DM, Chen IS, Hahn WC, Sharp PA, Weinberg RA, Novina CD 2003 Lentivirus-delivered stable gene silencing by RNAi in primary cells. *RNA* 9:493–501
- Thomas M, Lu JJ, Ge Q, Zhang C, Chen J, Klivanov AM 2005 Full deacylation of polyethylenimine dramatically boosts its gene delivery efficiency and specificity to mouse lung. *Proc Natl Acad Sci USA* 102:5679–5684
- Romero DG, Gomez-Sanchez EP, Gomez-Sanchez CE 2010 Angiotensin II-regulated transcription regulatory genes in adrenal steroidogenesis. *Physiol Genomics* 42A:259–266
- Romero DG, Plonczynski MW, Welsh BL, Gomez-Sanchez CE, Zhou MY, Gomez-Sanchez EP 2007 Gene expression profile in rat adrenal zona glomerulosa cells stimulated with aldosterone secretagogues. *Physiol Genomics* 32:117–127
- Romero DG, Zhou MY, Yanes LL, Plonczynski MW, Washington TR, Gomez-Sanchez CE, Gomez-Sanchez EP 2007 Regulators of G-protein signaling 4 in adrenal gland: localization, regulation, and role in aldosterone secretion. *J Endocrinol* 194:429–440
- Tannous BA 2009 Gaussia luciferase reporter assay for monitoring biological processes in culture and in vivo. *Nat Protoc* 4:582–591
- Berridge MV, Herst PM, Tan AS 2005 Tetrazolium dyes as tools in cell biology: new insights into their cellular reduction. *Biotechnol Annu Rev* 11:127–152
- Gomez-Sanchez CE, Foecking MF, Ferris MW, Chavarri MR, Uribe L, Gomez-Sanchez EP 1987 The production of monoclonal antibodies against aldosterone. *Steroids* 49:581–587
- Morra di Cella S, Veglio F, Mulatero P, Christensen V, Aycock K, Zhu Z, Gomez-Sanchez EP, Gomez-Sanchez CE 2002 A time-resolved fluoroimmunoassay for 18-oxocortisol and 18-hydroxycortisol. Development of a monoclonal antibody to 18-oxocortisol. *J Steroid Biochem Mol Biol* 82:83–88
- Mikhaylova IV, Kuulasmaa T, Jääskeläinen J, Voutilainen R 2007 Tumor necrosis factor- $\alpha$  regulates steroidogenesis, apoptosis, and cell viability in the human adrenocortical cell line NCI-H295R. *Endocrinology* 148:386–392



29. Planas-Silva MD, Means AR 1992 Expression of a constitutive form of calcium/calmodulin dependent protein kinase II leads to arrest of the cell cycle in G<sub>2</sub>. *EMBO J* 11:507–517
30. Chanklan R, Aihara E, Koga S, Takahashi H, Mizunuma M, Miyakawa T 2008 Inhibition of Ca<sup>2+</sup>-signal-dependent growth regulation by radicicol in budding yeast. *Biosci Biotechnol Biochem* 72:132–138
31. Tao X, Avalos JL, Chen J, MacKinnon R 2009 Crystal structure of the eukaryotic strong inward-rectifier K<sup>+</sup> channel Kir2.2 at 3.1 Å resolution. *Science* 326:1668–1674
32. Heitzmann D, Derand R, Jungbauer S, Bandulik S, Sterner C, Schweda F, El Wakil A, Lalli E, Guy N, Mengual R, Reichold M, Tegtmeyer I, Bendahhou S, Gomez-Sanchez CE, Aller MI, Wisden W, Weber A, Lesage F, Warth R, Barhanin J 2008 Invalidation of TASK1 potassium channels disrupts adrenal gland zonation and mineralocorticoid homeostasis. *EMBO J* 27:179–187
33. Davies LA, Hu C, Guagliardo NA, Sen N, Chen X, Talley EM, Carey RM, Bayliss DA, Barrett PQ 2008 TASK channel deletion in mice causes primary hyperaldosteronism. *Proc Natl Acad Sci USA* 105:2203–2208
34. Nelson MT, Cheng H, Rubart M, Santana LF, Bonev AD, Knot HJ, Lederer WJ 1995 Relaxation of arterial smooth muscle by calcium sparks. *Science* 270:633–637
35. Grimm PR, Irsik DL, Settles DC, Holtzclaw JD, Sansom SC 2009 Hypertension of *Kcnmb1*<sup>-/-</sup> is linked to deficient K secretion and aldosteronism. *Proc Natl Acad Sci USA* 106:11800–11805
36. Coyne MD, Cornelius P, Venditti N, Toscano DG, Gross MK, Toscano Jr WA 1985 Purification and properties of calmodulin from adrenal cortex. *Arch Biochem Biophys* 236:629–637
37. Antonini SR, Baldacchino V, Tremblay J, Hamet P, Lacroix A 2006 Expression of ACTH receptor pathway genes in glucose-dependent insulintrophic peptide (GIP)-dependent Cushing's syndrome. *Clin Endocrinol (Oxf)* 64:29–36
38. Wisgerhof M, Brown RD, Hogan MJ, Carpenter PC, Edis AJ 1981 The plasma aldosterone response to angiotensin II infusion in aldosterone-producing adenoma and idiopathic hyperaldosteronism. *J Clin Endocrinol Metab* 52:195–198
39. Kem DC, Weinberger MH, Higgins JR, Kramer NJ, Gomez-Sanchez C, Holland OB 1978 Plasma aldosterone response to ACTH in primary aldosteronism and in patients with low renin hypertension. *J Clin Endocrinol Metab* 46:552–560
40. Seccia TM, Miotto D, De Toni R, Pitter G, Mantero F, Pessina AC, Rossi GP 2009 Adrenocorticotrophic hormone stimulation during adrenal vein sampling for identifying surgically curable subtypes of primary aldosteronism: comparison of 3 different protocols. *Hypertension* 53:761–766
41. Sackmann S, Lichtenauer U, Shapiro I, Reincke M, Beuschlein F 2011 Aldosterone producing adrenal adenomas are characterized by activation of calcium/calmodulin-dependent protein kinase (CaMK) dependent pathways. *Horm Metab Res* 43:106–111
42. Lenzini L, Seccia TM, Aldighieri E, Belloni AS, Bernante P, Giuliani L, Nussdorfer GG, Pessina AC, Rossi GP 2007 Heterogeneity of aldosterone-producing adenomas revealed by a whole transcriptome analysis. *Hypertension* 50:1106–1113
43. Hamlet SM, Gordon RD, Gomez-Sanchez CE, Tunny TJ, Klemm SA 1988 Adrenal transitional zone steroids, 18-oxo and 18-hydroxycortisol, useful in the diagnosis of primary aldosteronism are ACTH-dependent. *Clin Exp Pharmacol Physiol* 15:317–322
44. Yamakita N, Mune T, Morita H, Yoshida H, Yasuda K, Miura K, Gomez-Sanchez CE 1994 Plasma 18-oxocortisol levels in the patients with adrenocortical disorders. *Clin Endocrinol (Oxf)* 40:583–587
45. Rey O, Young SH, Jacamo R, Moyer MP, Rozengurt E 2010 Extracellular calcium sensing receptor stimulation in human colonic epithelial cells induces intracellular calcium oscillations and proliferation inhibition. *J Cell Physiol* 225:73–83
46. Baron JA, Beach M, Mandel JS, van Stolk RU, Haile RW, Sandler RS, Rothstein R, Summers RW, Snover DC, Beck GJ, Bond JH, Greenberg ER 1999 Calcium supplements for the prevention of colorectal adenomas. Calcium Polyp Prevention Study Group. *N Engl J Med* 340:101–107
47. Roderick HL, Cook SJ 2008 Ca<sup>2+</sup> signalling checkpoints in cancer: remodelling Ca<sup>2+</sup> for cancer cell proliferation and survival. *Nat Rev Cancer* 8:361–375
